# Supplementary material
Source: publisher site journal article supplement (https://www.dovepress.com/article/506567)
Supplement: Supplementary file 1 [file 506567%20Revised%20Supplementary%20Table.pdf]

| <b>Sample ID</b> | <b>Viral Load (copies/mL)</b> | <b>Subtype</b> |
|------------------|-------------------------------|----------------|
| S1               | 106000                        | 07_BC          |
| S2               | 9610                          | 07_BC          |
| S3               | 4240                          | 07_BC          |
| S4               | 34500                         | 01_AE          |
| S5               | 53700                         | 01_AE          |
| S6               | 66200                         | 07_BC          |
| S7               | 35800                         | 07_BC          |
| S8               | 23500                         | C              |
| S9               | 20400                         | A              |
| S10              | 9280                          | 01_AE          |
| S11              | 1650                          | 01_AE          |
| S12              | 1470                          | 01_AE          |
| S13              | 1240                          | 55_01B         |
| S14              | 1070                          | B              |
| S15              | 1880                          | 08_BC          |
| S16              | 1340                          | 01_AE          |
| S17              | 1270                          | B              |
| S18              | 1730                          | 01_AE          |
| S19              | 1360                          | 01_AE          |
| S20              | 1460                          | 07_BC          |
